# Supplementary material
Source: Elsevier journal article supplement (https://www.sciencedirect.com/science/article/pii/S2341287920300223)
Supplement: mmc1 [file S2341287920300223:mmc1.docx]

**Material suplementario para publicar en línea:**

Encuesta realizada

Especifica tu vínculo con el niño/a:

Padre

Madre

Abuelo/a

Otros

Lugar donde suele dormir el niño/a:

Duerme en la cuna/cama, en una habitación independiente

Duerme en la cuna/cama, en la habitación de los padres

Duerme en la cuna/cama, en una habitación compartida con otro hermano

Duerme en la cama de los padres

Otros

¿Cuál es la posición en la que el niño/a duerme la mayor parte del tiempo?

Boca abajo

De lado

Boca arriba

¿Toma lactancia materna?

Sí, exclusiva

Sí, mixta (además de otros alimentos)

No

¿Utiliza chupete para dormir?

Sí

No

Si tu hija/o tiene algún problema o enfermedad crónica, por favor, indícalo a continuación

Texto libre

¿La madre fuma?

Sí, actualmente

No, pero fumaba

No, nunca he fumado

Durante las 2 últimas semanas ¿tu hijo/a ha estado expuesto pasivamente al tabaco en tu casa?

Sí

No

¿Y en otro lugar que no sea tu casa?

Sí

No

¿Qué situación describe mejor las "normas" para fumar dentro de tu casa?

Nadie puede fumar (no se fuma)

Sólo se puede fumar en algunos lugares dentro de casa

Se puede fumar donde sea (no hay normas)

No sabe, no contesta

Fecha de nacimiento del niño:

Texto libre

Sexo del niño:

Femenino

Masculino

Orden de este hijo entre los hermanos, si los tiene:

Es el mayor

Es intermedio

Es el pequeño

Es hijo único

Indica la fecha de nacimiento de la madre:

Texto libre

¿Podrías indicar tu nivel de estudios?

Primarios (EGB, ESO, etc)

Secundarios

Universitarios

¿En qué población resides?

Texto libre

Si deseas hacernos llegar un comentario escríbelo aquí:

Texto libre

Después de leer la hoja informativa, accedo a participar voluntariamente en el presente estudio sobre el sueño de los lactantes.

Acepto y doy mi consentimiento para participar libremente en este estudio

*¿Cuánto tiempo duerme el niño/a durante la noche? (entre las 8 de la tarde y las 7 de la mañana). Especifica horas y minutos.*

*Texto libre*

*¿Cuánto tiempo duerme durante el día? (entre las 7 de la mañana y las 8 de la tarde). Especifica horas y minutos.*

*Texto libre*

*¿Cuántas veces se despierta durante la noche? (en promedio):*

*Texto libre*

*¿Cuánto tiempo pasa despierto durante la noche? (desde las 8 de la tarde hasta las 7 de la mañana):*

*Texto libre*

*¿Cuánto tiempo tarda en dormirse después de acostarse?*

*Texto libre*

*¿Cómo consigues que se quede dormido/a? (marca una única opción)*

*Meciéndole en brazos*

*Meciéndole en la cuma o similar*

*Sosteniéndole en brazos sin mecer*

*Mientras come*

*En la misma cama de los padres*

*En su cuna/cama, en habitación independiente*

*Otros*

*Entre semana ¿a qué hora suele quedarse dormido por la noche?*

*Texto libre*

*¿Y en fin de semana y festivos?*

*Texto libre*

*¿Consideras los hábitos de sueño del niño/a un problema?*

*No, no es un problema*

*Si, aunque es un problema menor*

*Si, un problema muy serio*

*Si lo es ¿ cómo calificarías el problema de 0 a 10? (siendo 10 un problema muy serio)*

*Texto libre*

*Si has contestado que sus hábitos de sueño son un problema ¿Qué significa para vosotros que vuestro hijo/a no duerma bien?*

*Texto libre*

*¿Cómo se despierta habitualmente por la mañana?*

*Contento*

*Irritable, de mal humor*

*Es variable*

*¿Sigues una rutina pre-sueño que realices a diario antes de acostar al niño/a por la noche?*

*Sí*

*No*

*¿Le lees un trocito de cuento de forma habitual al acostarlo?*

*Sí*

*No*

*En realidad, no se lo leo, se lo cuento*

*¿Cuántas horas crees que debería dormir tu hijo/a a lo largo de todo un día idealmente, acorde a su edad actual?*

*Texto libre*

*¿Acude a guardería o similar de forma regular?*

*Sí
 No*

*¿Ha estado enfermo durante estas dos últimas semanas? (en caso afirmativo, por favor, especifica el síntoma)*

*Texto libre*

*¿El niño/a, tiene problemas o dificultad para respirar durante el sueño?*

*Sí*

*No*

*¿Le haces algún masaje antes de dormir?*

*Sí
 No*

*¿Habías oído hablar antes sobre el "tabaquismo de tercera mano"?*

*Sí*

*No*

*El "tabaquismo de tercera mano" es el residuo del humo del tabaco que se deposita en superficies de muebles, pared, tejidos... ¿Crees que la exposición a este "tabaquismo de tercera mano" puede ser perjudicial para los niños?*

*Sí, totalmente de acuerdo*

*Sí, de acuerdo*

*No estoy de acuerdo*

*Ni de acuerdo, ni en desacuerdo*

*NS/NC*

*Entre semana, ¿eres generalmente regular en la hora de irte a dormir?*

*Sí, soy bastante regular (raramente voy a dormir una hora antes/después de mi hora habitual)*

*No (mi hora de irme a dormir varía más de una hora respecto la que considero ideal)*

*Entre semana ¿A qué hora te acuestas (en promedio)?*

*Texto libre*

*Considerando tu propio ritmo de sueño, en condiciones ideales ¿a qué hora te levantarías si fueras libre para planificar el día?*

*Texto libre*

*¿Cómo consideras tu calidad de sueño de 0 a 10 (siendo 10, calidad muy alta), antes de tener al niño?*

*Texto libre*

*¿Cómo consideras la calidad de tu sueño de 0 a 10 (siendo 10, calidad muy alta), después de tener al niño?*

*Texto libre*

*Indica la fecha de nacimiento del padre:*

*Texto libre*

*¿El niño/a convive en el domicilio con ambos progenitores?*

*Sí*

*No*

*¿Cuántas personas convivís en el mismo domicilio?*

*Texto libre*
